# Supplementary material for: The stress-induced SCP/HLIP family of small light-harvesting-like proteins (ScpABCDE) protects Photosystem II from photoinhibitory damages in the cyanobacterium Synechocystis sp. PCC 6803
Source: PubMed Central journal article supplement (PMC5783992; doi:10.1007/s11120-017-0426-3), 2017-08-09
Supplement: 11120_2017_426_MOESM1_ESM.pdf [file 11120_2017_426_MOESM1_ESM.pdf]

Supplementary  
Figure 1

pH 9

pH 8

pH 6.5

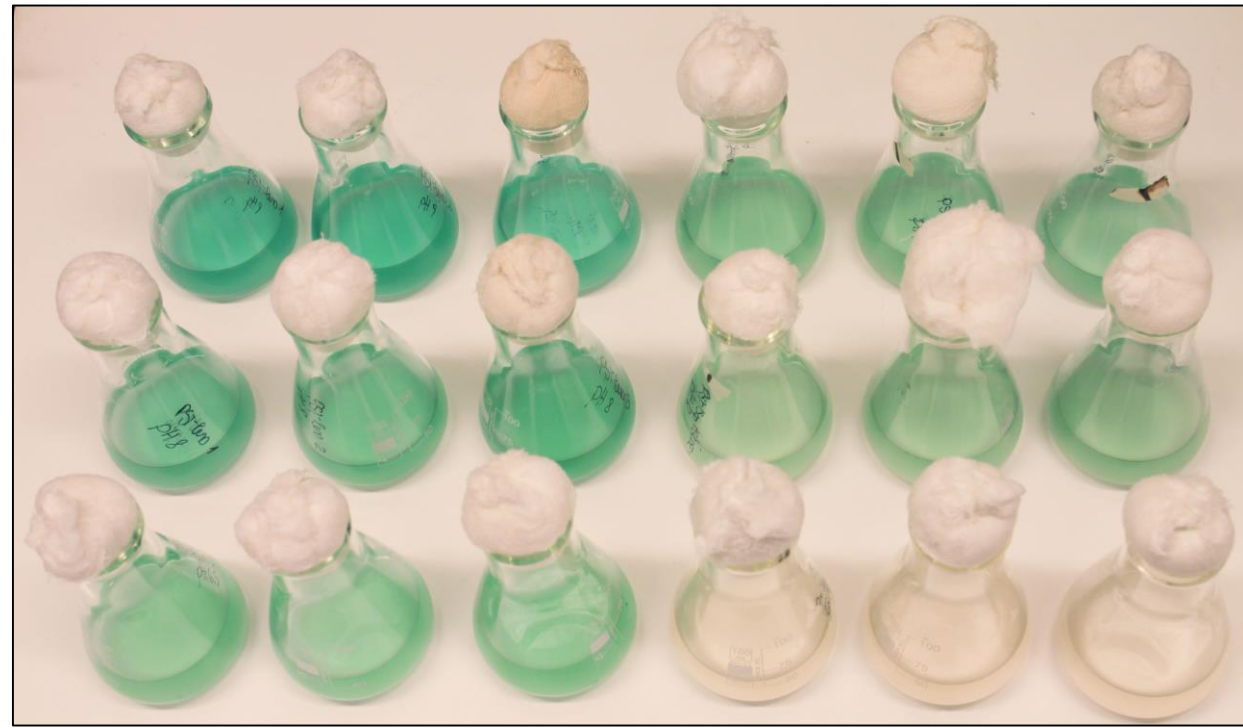

PSI-less

PSI-less/ScpABCDE-

pH 8

+ HCO<sub>3</sub><sup>-</sup>

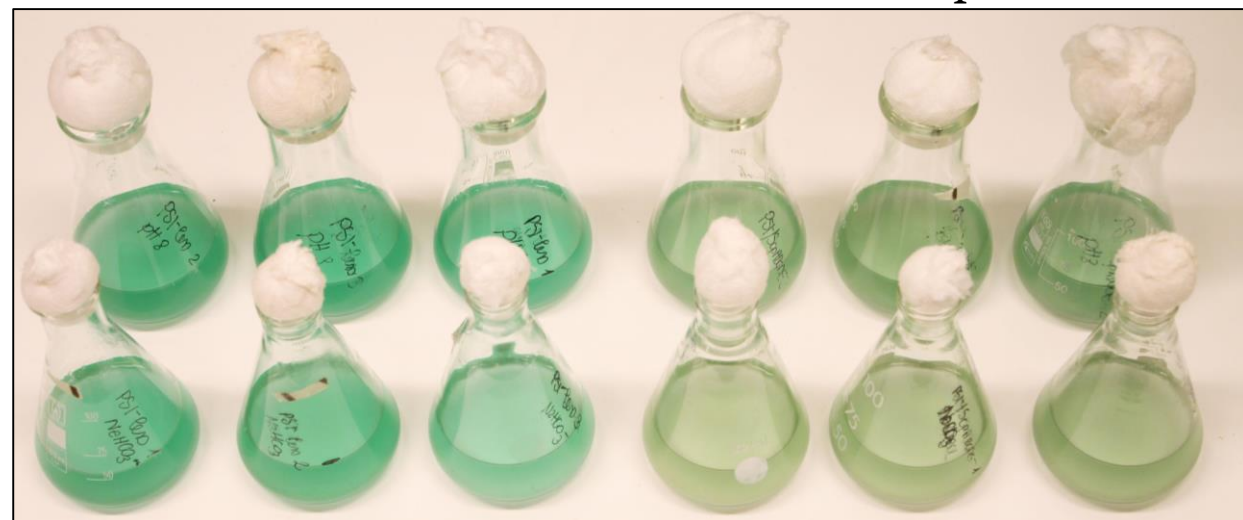

PSI-less

PSI-less/ScpABCDE-
